# Supplementary material for: Insights on Lulworthiales Inhabiting the Mediterranean Sea and Description of Three Novel Species of the Genus Paralulworthia
Source: MDPI journal article supplement (doi:10.3390/jof7110940), 2021-11-06
Supplement: s1 [file s1]

**Table S1.** Dataset used for phylogenetic analysis. Genbank sequences include newly generated nrITS, nrLSU, nrSSU, RPB1, RPB2, TEF-1 $\alpha$  and  $\beta$ TUB amplicons relative to the novel species *Paralulworthia candida*, *P. elbensis* and *P. mediterranea* (in bold)

| Species                                                                  | Strain               | Source                                     | nrITS           | nrSSU           | nrLSU           | EF-1 $\alpha$   | RPB1            | RPB2            | $\beta$ TUB     |
|--------------------------------------------------------------------------|----------------------|--------------------------------------------|-----------------|-----------------|-----------------|-----------------|-----------------|-----------------|-----------------|
| <b><u>Lulworthiales</u></b>                                              |                      |                                            |                 |                 |                 |                 |                 |                 |                 |
| <b><u>Lulworthiaceae</u></b>                                             |                      |                                            |                 |                 |                 |                 |                 |                 |                 |
| <i>Halazoon mehlae</i> Abdel-Aziz, Abdel-Wahab & Nagah.                  | MF819 <sup>†</sup>   | Drift stems of <i>Phragmites australis</i> | --              | GU252144        | GU252143        | --              | --              | --              | --              |
| <i>H. fuscus</i> (Schmidt) Abdel-Wahab, Pang, Nagah., Abdel-Aziz & Jones | NBRC 105256          | Driftwood                                  | --              | GU252148        | GU252147        | --              | --              | --              | --              |
| <i>L. medusa</i> (Ellis & Everh.) Cribb & Cribb                          | JK 5581 <sup>†</sup> | Spartina                                   | --              | AF195636        | AF195637        | --              | --              | --              | --              |
| <i>L. cf. purpurea</i> (Wilson) Johnson                                  | FCUL170907CP5        | Sea water                                  | KT347219        | KT347201        | JN886824        | --              | --              | --              | --              |
|                                                                          | FCUL280207CF9        | Sea water                                  | KT347218        | KT347202        | JN886808        | --              | --              | --              | --              |
| <b><i>Paralulworthia candida</i> sp. nov.</b>                            | MUT 5430             | <i>P. oceanica</i>                         | <b>MZ357724</b> | <b>MZ357767</b> | <b>MZ357746</b> | <b>MZ407526</b> | --              | <b>MZ357229</b> | <b>MZ407550</b> |
| <b><i>Paralulworthia elbensis</i> sp. nov.</b>                           | MUT 377              | <i>P. oceanica</i>                         | <b>MZ357710</b> | <b>MZ357753</b> | <b>MZ357732</b> | <b>MZ407516</b> | <b>MZ365271</b> | <b>MZ357215</b> | <b>MZ407536</b> |
|                                                                          | MUT 5422             | <i>P. oceanica</i>                         | <b>MZ357723</b> | <b>MZ357766</b> | <b>MZ357745</b> | <b>MZ407525</b> | --              | <b>MZ357228</b> | <b>MZ407549</b> |
|                                                                          | MUT 5438             | <i>P. oceanica</i>                         | <b>MZ357712</b> | <b>MZ357755</b> | <b>MZ357734</b> | <b>MZ407518</b> | --              | <b>MZ357217</b> | <b>MZ407538</b> |
|                                                                          | MUT 5461             | <i>P. oceanica</i>                         | <b>MZ357725</b> | <b>MZ357768</b> | <b>MZ357747</b> | --              | --              | <b>MZ357230</b> | --              |
| <i>Paralulworthia gigaspora</i> Prigione, Poli, Bovio & Varese           | MUT 435 <sup>†</sup> | <i>P. oceanica</i>                         | MN649242        | MN649246        | MN649250        | <b>MZ407533</b> | <b>MZ365286</b> | <b>MZ357236</b> | <b>MZ407557</b> |
|                                                                          | MUT 5413             | <i>P. oceanica</i>                         | MN649243        | MN649247        | MN649251        | <b>MZ407534</b> | <b>MZ365287</b> | <b>MZ357237</b> | <b>MZ407558</b> |
|                                                                          | MUT 263              | Oil-contaminated Sea water                 | <b>MZ357729</b> | <b>MZ357772</b> | <b>MZ357751</b> | <b>MZ407531</b> | --              | <b>MZ357234</b> | <b>MZ407555</b> |
|                                                                          | MUT 465              | <i>P. oceanica</i>                         | <b>MZ357726</b> | <b>MZ357769</b> | <b>MZ357748</b> | <b>MZ407534</b> | <b>MZ365282</b> | <b>MZ357231</b> | <b>MZ407552</b> |
|                                                                          | MUT 1753             | Oil-contaminated Sea water                 | <b>MZ357730</b> | <b>MZ357773</b> | <b>MZ357752</b> | <b>MZ407532</b> | <b>MZ365285</b> | <b>MZ357235</b> | <b>MZ407556</b> |
|                                                                          | MUT 5085             | <i>P. oceanica</i>                         | <b>MZ357715</b> | <b>MZ357758</b> | <b>MZ357737</b> | <b>MZ407521</b> | <b>MZ365274</b> | <b>MZ357220</b> | <b>MZ407541</b> |
|                                                                          | MUT 5086             | <i>P. oceanica</i>                         | <b>MZ357716</b> | <b>MZ357759</b> | <b>MZ357738</b> | <b>MZ407522</b> | <b>MZ365275</b> | <b>MZ357221</b> | <b>MZ407542</b> |

|                                                                          |                       |                    |                 |                 |                 |                 |                 |                 |                 |
|--------------------------------------------------------------------------|-----------------------|--------------------|-----------------|-----------------|-----------------|-----------------|-----------------|-----------------|-----------------|
|                                                                          | MUT 5093              | <i>P. oceanica</i> | <b>MZ357718</b> | <b>MZ357761</b> | <b>MZ357740</b> | --              | <b>MZ365277</b> | <b>MZ357223</b> | <b>MZ407544</b> |
|                                                                          | MUT 5094              | <i>P. oceanica</i> | <b>MZ357719</b> | <b>MZ357762</b> | <b>MZ357741</b> | <b>MZ407524</b> | <b>MZ365278</b> | <b>MZ357224</b> | <b>MZ407545</b> |
| <i>Paralulworthia halima</i><br>(Anastasiou) Gonçalves,<br>Abreu & Alves | CMG 68                | Submerged wood     | MT235736        | MT235712        | MT235753        | --              | --              | --              | --              |
|                                                                          | CMG 69                | Submerged wood     | MT235737        | MT235713        | MT235754        | --              | --              | --              | --              |
|                                                                          | MUT 1483              | Submerged wood     | <b>MZ357727</b> | <b>MZ357770</b> | <b>MZ357749</b> | <b>MZ407529</b> | <b>MZ365283</b> | <b>MZ357232</b> | <b>MZ407553</b> |
|                                                                          | MUT 2919              | Submerged wood     | <b>MZ357713</b> | <b>MZ357756</b> | <b>MZ357735</b> | <b>MZ407519</b> | <b>MZ365272</b> | <b>MZ357218</b> | <b>MZ407539</b> |
|                                                                          | MUT 3347              | Submerged wood     | <b>MZ357728</b> | <b>MZ357771</b> | <b>MZ357750</b> | <b>MZ407530</b> | <b>MZ365284</b> | <b>MZ357233</b> | <b>MZ407554</b> |
| <i>Paralulworthia posidoniae</i><br>Poli, Prigione, Bovio & Varese       | MUT 5261 <sup>†</sup> | <i>P. oceanica</i> | MN649245        | MN649249        | MN649253        | <b>MZ407535</b> | --              | <b>MZ357238</b> | <b>MZ407559</b> |
|                                                                          | MUT 5092              | <i>P. oceanica</i> | <b>MZ357717</b> | <b>MZ357760</b> | <b>MZ357739</b> | <b>MZ407523</b> | <b>MZ365276</b> | <b>MZ357222</b> | <b>MZ407543</b> |
|                                                                          | MUT 5110              | <i>P. oceanica</i> | <b>MZ357720</b> | <b>MZ357763</b> | <b>MZ357742</b> | --              | <b>MZ365279</b> | <b>MZ357225</b> | <b>MZ407546</b> |
|                                                                          | MUT 5419              | <i>P. oceanica</i> | <b>MZ357722</b> | <b>MZ35776</b>  | <b>MZ357744</b> | --              | <b>MZ365281</b> | <b>MZ357227</b> | <b>MZ407548</b> |
| <i>Paralulworthia mediterranea</i> <b>sp. nov.</b>                       | MUT 654               | <i>P. oceanica</i> | <b>MZ357711</b> | <b>MZ357754</b> | <b>MZ357733</b> | <b>MZ407517</b> | --              | <b>MZ357216</b> | <b>MZ407537</b> |
|                                                                          | MUT 5080              | <i>P. oceanica</i> | <b>MZ357714</b> | <b>MZ357757</b> | <b>MZ357736</b> | <b>MZ407520</b> | <b>MZ365273</b> | <b>MZ357219</b> | <b>MZ407540</b> |
|                                                                          | MUT 5417 <sup>†</sup> | <i>P. oceanica</i> | <b>MZ357721</b> | <b>MZ357764</b> | <b>MZ357743</b> | --              | <b>MZ365280</b> | <b>MZ357226</b> | <b>MZ407547</b> |

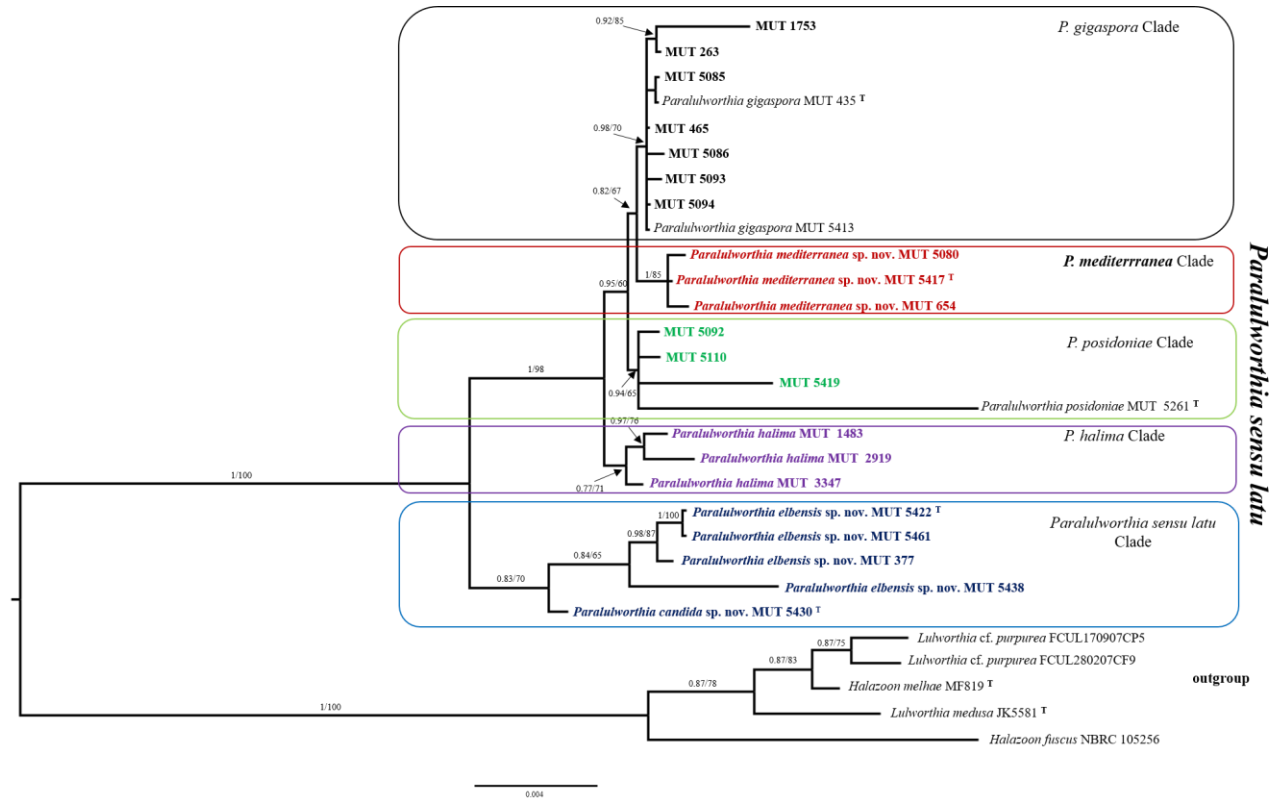

**Figure S1.** Phylogenetic inference based on a combined nrITS, nrSSU, nrLSU, RPB1, RPB2, TEF-1 $\alpha$  and  $\beta$ TUB dataset. Colours indicate the belonging to different groups. Branch numbers indicate BYPP and BS values; <sup>†</sup> = Type Strain; Bar = expected changes per site (0.004).
